# Supplementary material
Source: publisher figshare collection journal article supplement (https://gsapubs.figshare.com/articles/dataset/_/23802813)
Supplement: Supplementary file 1 [file 1]

## Sheet: Sheet1
	East of Rundle (EOR) section (51°007′ 28″N;115°26′14″W)													Jura Creek (JC) section (51°005′ 26″N; 115°009′29″W)
				δ13Corg.	Mo	U	Th	Cd	Al	TOC							δ13Corg.	Mo	U	Th	Cd	Al	TOC
	Formation	Sample ID	Height (m)		PPM	PPM	PPM	PPM	%	%				Formation	Sample ID	Height (m)		PPM	PPM	PPM	PPM	%	%
	Exshaw	408-19-1	0	-29.05	1.8	3.5	8	0.03	6.48	1.73				Palliser	MH13-1-36	0	-28.01	0.21	0.3	1	0.02	0.92	0
	Exshaw	408-19-2	0.1	-29.05	1.22	3.1	7.3	<0.02	6.61	1.74				Palliser	MH13-1-35	0.5	-27.66	0.14	0.2	0.2	0.18	0.14	0
	Exshaw	408-19-3	0.2	-28.94	1.41	2.9	7.3	<0.02	6.41	1.87				Palliser	MH13-1-34	0.9	-28.08	0.22	0.3	0.4	0.02	0.36	0
	Exshaw	408-19-4	0.3	-29.1	1.15	2.8	7	<0.02	6.2	1.91				Palliser	MH13-1-33	1.4	-28.2	1.08	1.8	0.4	0.02	0.38	0
	Exshaw	408-19-5	0.4	-29.07	1.36	2.7	6.6	0.2	5.84	1.73				Palliser	MH13-1-32	1.7	-27.9	0.92	2.4	0.4	0.02	0.42	0
	Exshaw	408-19-6	0.5	-29.1	2.08	2.5	6.6	0.17	5.6	1.84				Exshaw	MH13-1-0.1	2.1	-27.7	139.06	31.1	6.5	1.26	4.69	5.82
	Exshaw	408-19-7	0.6	-29.12	3.42	2.7	6.4	0.35	5.25	1.73				Exshaw	MH13-1-0.2	2.2	-28.09	65.06	19.9	4.7	0.21	3.14	5
	Exshaw	408-19-8	0.7	-29.14	4.18	3.3	6.7	0.96	5.25	1.69				Exshaw	MH13-1-0.3	2.3	-28.06	96.97	24.3	4.9	0.27	3.98	5.02
	Exshaw	408-19-9	0.8	-29.06	4.14	2.9	5.5	0.49	4.69	1.62				Exshaw	MH31-1-0.4	2.4	-28.1	80.3	23.2	4	0.33	3.49	5.03
	Exshaw	408-19-10	0.9	-29.17	3.9	3.7	5.8	0.09	4.83	1.75				Exshaw	MH13-1-2	2.5	-28.44	66.87	21.7	4.5	0.07	3.53	5.03
	Exshaw	408-19-11	1	-29.06	5.02	6.7	5.9	0.55	4.62	1.75				Exshaw	MH13-1-3	3	-28.02	80.76	24.9	5.3	0.02	4.08	4.11
	Exshaw	408-19-12	1.1	-28.95	28.88	21	8.9	3.21	6.62	3				Exshaw	MH13-1-4	3.5	-28.62	91.75	24.1	3.5	0.23	2.58	5.23
	Exshaw	408-19-13	1.2	-28.68	173	27.8	6.7	0.58	4.63	6.81				Exshaw	MH13-1-5	4	-28.58	66.47	14.2	3.9	1.73	3.21	3.68
	Exshaw	408-19-14	1.3	-28.53	124.71	25.7	6.8	0.8	4.39	5.33				Exshaw	MH13-1-6	4.5	-28.54	88.53	15.2	4.2	0.59	3.69	4
	Exshaw	408-19-15	1.4	-28.91	84.53	14.2	4.4	0.94	3.07	5.02				Exshaw	MH13-1-7	5	-28.5	44.02	12.6	2.8	1.69	2.2	2.74
	Exshaw	408-19-16	1.5	-29.11	88.88	15.6	4.1	0.98	2.86	3.71				Exshaw	MH13-1-8	5.5	-28.56	62.02	11.5	3.7	2.63	2.9	3.89
	Exshaw	408-19-17	1.6	-28.81	120.35	34.7	5.2	0.7	3.58	4.38				Exshaw	MH13-1-9	6	-27.97	92.53	12	4.6	0.05	5.23	4.48
	Exshaw	408-19-18	1.7	-28.85	81.06	23.4	5.3	1.03	3.7	3.91				Exshaw	MH13-1-10	6.5	-28.5	61.68	15.2	6.5	4.43	5.24	4.16
	Exshaw	408-19-19	1.8	-28.93	29.62	4.9	2.3	0.03	2.14	3.06				Exshaw	MH13-1-11	7	-28.53	46.73	14	5.1	10.1	4.66	3.43
	Exshaw	408-19-20	1.9	-29.05	62.24	12.1	4.7	0.12	3.71	4.17				Exshaw	MH13-1-12	7.5	-28.64	74.38	13.3	6.8	2.02	6.02	4.29
	Exshaw	408-19-21	2	-29.12	51.62	11	4.2	1.02	3.02	3.68				Exshaw	MH13-1-13	8	-27.42	54.17	10.9	6	0.3	4.99	3.4
	Exshaw	408-19-22	2.2	-28.81	62.23	16.1	5.8	2.24	3.66	3.67				Exshaw	MH13-1-14	8.5	-26.86	11.76	3.6	9.9	0.08	7.51	1.48
	Exshaw	408-19-23	2.4	-28.75	51.44	13.3	4.5	1.11	2.82	3.44				Exshaw	MH13-1-15	9	-26.59	10.05	3.4	9.8	0.05	7.55	1.41
	Exshaw	408-19-24	2.6	-29.38	47.12	10.3	2.1	0.97	1.37	2.34				Exshaw	MH13-1-16	9.5	-26.96	9.36	3.3	8.7	0.08	6.7	1.9
	Exshaw	408-19-25	2.8	-29.31	46.35	8	2.2	0.5	1.62	2.65				Exshaw	MH13-1-17	10	-26.1	6.68	2.9	7.3	0.04	5.57	1.7
	Exshaw	408-19-26	3	-28.87	73.74	16.1	4.3	0.64	2.78	3				Exshaw	MH13-1-18	10.5	-27.02	2.59	2.5	8	0.06	5.35	0.96
	Exshaw	408-19-27	3.2	-29.08	81.86	15	4	2.03	2.31	3.34				Exshaw	MH13-1-19	11	-26.26	8.09	3.2	8.1	0.07	6.06	1.82
	Exshaw	408-19-28	3.4	-29.18	46.11	14.1	2.8	5.07	1.68	2.13				Exshaw	MH13-1-21	12		0.59	1.5	5.2	0.05	3.23	0.18
	Exshaw	408-19-29	3.6	-29.13	62.92	15.2	3.5	8.52	1.7	2.54				Exshaw	MH13-1-22	12.5		0.4	1.6	5.2	0.07	3.04	0.12
	Exshaw	408-19-30	3.8	-29.01	121.4	56.7	6.2	1.07	3.14	3.27				Exshaw	MH13-1-23	13		0.35	1.6	5.9	0.05	3.29	0.12
	Exshaw	408-19-31	4	-29.12	110.98	32.2	10	0.71	3.5	3.32				Exshaw	MH13-1-24	13.5		0.26	1.4	4.3	0.03	2.56	0.1
	Exshaw	408-19-32	4.2	-29.15	136.29	25.1	6.2	0.7	3.83	4.27				Exshaw	MH13-1-25	14		0.48	1.6	5.8	0.02	3.17	0.11
	Exshaw	408-19-33	4.4	-29.3	87.12	17.4	5	0.49	2.44	3.66				Exshaw	MH13-1-26	14.5		0.29	1.5	4.9	0.02	2.68	0.08
	Exshaw	408-19-34	4.6	-29.47	58.35	12.7	2.8	1.18	1.63	2.3				Exshaw	MH13-1-27	15		0.37	1.5	4.9	0.02	2.71	0.07
	Exshaw	408-19-35	4.8	-29.41	80.46	12.5	4.1	0.26	2.58	3.51
	Exshaw	408-19-36	5	-29.49	85.03	17.9	3.9	0.5	2.36	3.46
	Exshaw	408-19-37	5.2	-29.53	54.85	10.8	3	0.91	1.85	2.42
	Exshaw	408-19-38	5.4	-29.34	80.39	14.5	4	2.67	2.69	3.1
	Exshaw	408-19-39	5.6	-29.25	111.28	22.9	4.9	1.57	3.11	3.81
	Exshaw	408-19-40	5.8	-29.25	112.39	20	11.7	1.55	4.74	3.05
	Exshaw	408-19-41	6	-29.37	76.89	12.5	5.2	0.41	3.04	2.31
	Exshaw	408-19-42	6.2	-29.59	63.03	13.7	5.5	0.75	4.34	2.34
	Exshaw	408-21-43	6.4	-28.77	130.8	20.4	16.4	13.2	5.76	2.85
	Exshaw	408-21-44	6.6	-29.15	58.34	9.5	4.7	5.23	2.65	2.42
	Exshaw	408-21-45	6.8	-28.99	120.06	22.2	6.6	13.38	4.42	2.64
	Exshaw	408-21-46	7	-28.36	54.23	6.8	2.7	201.21	1.81	1.31
	Exshaw	408-21-47	7.2	-29.09	70.91	10.5	2.9	7.92	2.27	2.12
	Exshaw	408-21-48	7.4	-28.97	61.91	15.4	2.9	6.79	2.44	2.04
	Exshaw	408-21-49	7.6	-28.88	33.63	15.2	4.5	0.48	4.06	2.93
	Exshaw	408-21-50	7.8	-28.98	15.28	12.6	3.5	1.85	3.36	3.76
	Exshaw	408-21-51	8	-28.93	33.82	12.8	5.6	6.42	5	3.3
	Exshaw	408-21-52	8.2	-29	29.06	15	5.3	2.99	5.11	3.72
	Exshaw	408-21-53	8.4	-29.25	60.83	15.1	5.6	0.29	4.43	4.13
	Exshaw	408-21-54	8.6	-29.18	261.34	31.3	8.3	7.39	5.27	5.1
	Exshaw	408-21-55	8.8	-29.39	424.18	39.3	7.9	0.95	5.43	7.28
	Exshaw	408-21-56	9	-29.16	371.57	42.2	8	5.11	5.43	5.36
	Exshaw	408-21-57	9.2	-28.37	2.19	2.9	7	0.1	4.92	1.35
	Exshaw	408-21-58	9.4	-20.69	4.44	1.7	4.6	0.13	2.91	0.75
